# Supplementary material
Source: publisher figshare collection journal article supplement (https://aacr.figshare.com/ndownloader/files/39984964)
Supplement: Supplementary file 1 [file 39984964]

## Sheet: Sheet1
Table S3, Webb and Yamamoto, et al 2021
OVCAR3 Cells					DepMap Analysis (Accessed 12/09/2021)
Compound	Class	Cell Viability in shCTRL	Cell Viability in shCLDN4		Compound (DepMap DataSet)	Class	Pearson r Cor w/CLDN4 Expression and Compound AUC	p-Value	Adj p-value
Abemaciclib	Kinase Inhibitor	98	95		leflunomide (GDSC2:1578)	Anti-metabolite	0.267081	2.63814e-10	2.63814e-10
Abiraterone	Hormone	110	80		5-fluorouracil (GDSC2:1073)	Anti-metabolite	0.0976063	0.0295774	0.0295774
Acalabrutinib	Kinase Inhibitor	101	106		nelarabine (GDSC2:1814)	Anti-metabolite	0.0866441	0.147429	0.147429
Afatinib	Kinase Inhibitor	53	70		vincristine (GDSC2:1818)	Anti-tubulin	0.401115	8.63338e-22	8.63338e-22
Alectinib	Kinase Inhibitor	93	103		vinblastine (GDSC2:1004)	Anti-tubulin	0.382208	2.69696e-20	2.69696e-20
Allopurinol	Metabolic	128	72		Podophyllotoxin bromide (GDSC2:1825)	Anti-tubulin	0.359271	2.07466e-17	2.07466e-17
Altretamine	Other	111	110		vinorelbine (GDSC2:2048)	Anti-tubulin	0.337404	8.63009e-16	8.63009e-16
Amifostine	Other	112	105		docetaxel (GDSC2:1819)	Anti-tubulin	0.271102	2.0591e-09	2.0591e-09
Aminolevulinic acid hydrochloride	Other	118	92		docetaxel (GDSC2:1007)	Anti-tubulin	0.228942	4.65987e-08	4.65987e-08
Anastrozole	Hormone	110	97		paclitaxel (GDSC2:1080)	Anti-tubulin	0.0515164	0.267586	0.267586
Apalutamide	Hormone	99	99		cisplatin (GDSC2:1005)	DNA Damage	0.294091	2.9798e-11	2.9798e-11
Arsenic trioxide	Other	131	116		niraparib (GDSC2:1177)	DNA Damage	0.284958	4.23941e-09	4.23941e-09
Axitinib	Kinase Inhibitor	101	110		talazoparib (GDSC2:1259)	DNA Damage	0.236433	3.21378e-08	3.21378e-08
Azacitidine	Epigenetic	105	89		mirin (GDSC2:1048)	DNA Damage	0.19855	3.77241e-06	3.77241e-06
Belinostat	Epigenetic	36	52		oxaliplatin (GDSC2:1089)	DNA Damage	0.196392	4.01075e-06	4.01075e-06
Bendamustine hydrochloride	DNA Damage	116	63		oxaliplatin (GDSC2:1806)	DNA Damage	0.185872	4.75724e-05	4.75724e-05
Binimetinib	Kinase Inhibitor	84	73		temozolomide (GDSC2:1375)	DNA Damage	0.157405	0.0016551	0.0016551
Bleomycin sulfate	Other	46	68		olaparib (GDSC2:1017)	DNA Damage	0.100995	0.0233599	0.0233599
Bortezomib	Proteosome Inhibitor	34	31		carmustine (GDSC2:1807)	DNA Damage	-0.0183086	0.716445	0.716445
Bosutinib	DNA Damage	91	60		cyclophosphamide (GDSC2:1512)	DNA Damage	-0.000320973	0.995274	0.995274
Brigatinib	Kinase Inhibitor	91	78		epirubicin (GDSC2:1511)	DNA Replication Inhibitor	0.407683	1.34557e-23	1.34557e-23
Busulfan	Cell Cycle Iinhibitor	114	107		mitoxantrone (GDSC2:1810)	DNA Replication Inhibitor	0.405617	1.73683e-22	1.73683e-22
Cabazitaxel	Anti-tubulin	27	52		teniposide (GDSC2:1809)	DNA Replication Inhibitor	0.403429	3.34665e-22	3.34665e-22
Cabozantinib	Kinase Inhibitor	118	103		dactinomycin (GDSC2:1911)	DNA Replication Inhibitor	0.390697	2.78214e-21	2.78214e-21
Capecitabine	Antimetabolite	123	47		gemcitabine (GDSC2:1190)	DNA Replication Inhibitor	0.351596	5.53847e-17	5.53847e-17
Carboplatin	DNA Damage	105	72		cytarabine (GDSC2:1006)	DNA Replication Inhibitor	0.343413	8.15691e-15	8.15691e-15
Carfilzomib	Proteosome Inhibitor	20	28		camptothecin (GDSC2:1003)	DNA Replication Inhibitor	0.320975	1.50335e-14	1.50335e-14
Carmustine	Cell Cycle Iinhibitor	117	99		irinotecan (GDSC2:1088)	DNA Replication Inhibitor	0.295889	1.05486e-11	1.05486e-11
Celecoxib	Metabolic	127	96		topotecan (GDSC2:1808)	DNA Replication Inhibitor	0.284306	2.28131e-11	2.28131e-11
Ceritinib	Kinase Inhibitor	82	106		dactinomycin (GDSC2:1811)	DNA Replication Inhibitor	0.102704	0.0271197	0.0271197
Chlorambucil	DNA Damage	108	28		vorinostat (GDSC2:1012)	Epigenetic	0.301283	4.78807e-13	4.78807e-13
Cisplatin	DNA Damage	139	101		entinostat (GDSC2:1593)	Epigenetic	0.240618	1.49721e-08	1.49721e-08
Cladribine	Antimetabolite	64	73		OTX015 (GDSC2:1626)	Epigenetic	0.244633	2.19003e-08	2.19003e-08
Clofarabine	Other	57	70		I-BET-762 (GDSC2:1624)	Epigenetic	0.239687	6.14558e-08	6.14558e-08
Cobimetinib	Kinase Inhibitor	89	54		I-BRD9 (GDSC2:1928)	Epigenetic	0.226925	2.91977e-07	2.91977e-07
Copanlisib	Kinase Inhibitor	66	81		PCI-34051 (GDSC2:1621)	Epigenetic	0.211104	1.22471e-05	1.22471e-05
Crizotinib	Kinase Inhibitor	54	78		Apabetalone (GDSC2:1625)	Epigenetic	0.130231	0.0158048	0.0158048
Cyclophosphamide	DNA Damage	116	109		OF-1 (GDSC2:1853)	Epigenetic	-0.110351	0.0160139	0.0160139
Cytarabine hydrochloride	Antimetabolite	55	72		AOB2221 (GDSC2:1620)	Epigenetic	0.0965967	0.123173	0.123173
Dabrafenib mesylate	Kinase Inhibitor	79	79		EPZ-5676 (GDSC2:1563)	Epigenetic	0.0808659	0.135583	0.135583
Dacarbazine	Cell Cycle Iinhibitor	112	101		JQ1-(+) (GDSC2:2172)	Epigenetic	0.0599955	0.702336	0.702336
Dacomitinib	Kinase Inhibitor	64	85		AOB3680 (GDSC2:1627)	Epigenetic	0.0200203	0.741465	0.741465
Dactinomycin	Other	26	28		GSK3203591 (GDSC2:2110)	Epigenetic	0.0138223	0.791853	0.791853
Dasatinib	Kinase Inhibitor	53	34		EPZ004777 (GDSC2:1237)	Epigenetic	-0.00464158	0.928713	0.928713
Daunorubicin hydrochloride	DNA Replication Inhibitor	42	35		tamoxifen (GDSC2:1199)	Hormone	0.128994	0.00287568	0.00287568
Decitabine	Epigenetic	94	45		fulvestrant (GDSC2:1200)	Hormone	-0.0821776	0.102926	0.102926
Dexrazoxane	Cell Cycle Iinhibitor	107	77		GDC 0810 (GDSC2:1925)	Hormone	-0.0710673	0.153411	0.153411
Docetaxel	Anti-tubulin	27	44		fulvestrant (GDSC2:1816)	Hormone	0.0656699	0.168624	0.168624
Doxorubicin hydrochloride	Cell Cycle Iinhibitor	31	29		AZ960 (GDSC2:1250)	Kinase Inhibitor	0.381229	2.49598e-19	2.49598e-19
Duvelisib	Kinase Inhibitor	77	104		AZD7762 (GDSC2:1022)	Kinase Inhibitor	0.363388	3.0768e-18	3.0768e-18
Enasidenib	Metabolic	94	111		AZD8931 (GDSC2:1549)	Kinase Inhibitor	-0.373533	4.22634e-18	4.22634e-18
Encorafenib	Kinase Inhibitor	74	66		Wee1 Inhibitor (GDSC2:1046)	Kinase Inhibitor	0.344685	9.2574e-17	9.2574e-17
Enzalutamide	Hormone	117	120		alisertib (GDSC2:1051)	Kinase Inhibitor	0.342276	3.45074e-15	3.45074e-15
Epirubicin hydrochloride	Cell Cycle Iinhibitor	33	32		MK-1775 (GDSC2:1179)	Kinase Inhibitor	0.316302	6.77397e-14	6.77397e-14
Erismodegib	Other	92	74		dinaciclib (GDSC2:1180)	Kinase Inhibitor	0.316679	7.01945e-14	7.01945e-14
Erlotinib hydrochloride	Kinase Inhibitor	92	87		osimertinib (GDSC2:1919)	Kinase Inhibitor	-0.273967	1.71425e-10	1.71425e-10
Estramustine phosphate sodium	Hormone	130	44		NVP-BEZ235 (GDSC2:1057)	Kinase Inhibitor	0.253578	1.85298e-09	1.85298e-09
Etoposide	DNA Replication Inhibitor	59	77		AZD6738 (GDSC2:1917)	Kinase Inhibitor	0.249009	2.82279e-09	2.82279e-09
Everolimus	Kinase Inhibitor	68	30		lapatinib (GDSC2:1558)	Kinase Inhibitor	-0.245813	6.47069e-09	6.47069e-09
Exemestane	Hormone	114	108		SCH900776 (GDSC2:2046)	Kinase Inhibitor	0.242821	2.71309e-08	2.71309e-08
Floxuridine	Antimetabolite	68	72		AZD3759 (GDSC2:1915)	Kinase Inhibitor	-0.274885	4.03701e-08	4.03701e-08
Fludarabine phosphate	Antimetabolite	110	117		foretinib (GDSC2:2040)	Kinase Inhibitor	0.227073	6.36502e-08	6.36502e-08
Fluorouracil	Antimetabolite	73	84		buparlisib (GDSC2:1873)	Kinase Inhibitor	0.225475	8.81058e-08	8.81058e-08
Fulvestrant	Hormone	99	102		erlotinib (GDSC2:1168)	Kinase Inhibitor	-0.238466	1.03492e-07	1.03492e-07
Gefitinib	Kinase Inhibitor	90	98		afatinib (GDSC2:1032)	Kinase Inhibitor	-0.231513	1.04549e-07	1.04549e-07
Gemcitabine hydrochloride	DNA Replication Inhibitor	50	59		VE 821 (GDSC2:2111)	Kinase Inhibitor	0.251426	1.4995e-07	1.4995e-07
Hydroxyurea	DNA Replication Inhibitor	119	100		sorafenib (GDSC2:1085)	Kinase Inhibitor	0.22064	1.81162e-07	1.81162e-07
Ibrutinib	Kinase Inhibitor	95	48		gefitinib (GDSC2:1010)	Kinase Inhibitor	-0.26821	2.21157e-07	2.21157e-07
Idarubicin hydrochloride	Cell Cycle Iinhibitor	26	27		ibrutinib (GDSC2:1799)	Kinase Inhibitor	-0.257976	7.23204e-07	7.23204e-07
Idelalisib	Kinase Inhibitor	103	112		BDP-00009066 (GDSC2:1866)	Kinase Inhibitor	0.201439	2.04168e-06	2.04168e-06
Ifosfamide	DNA Damage	129	94		dabrafenib (GDSC2:1373)	Kinase Inhibitor	0.206399	2.84287e-06	2.84287e-06
Imatinib	Kinase Inhibitor	116	48		palbociclib (GDSC2:1054)	Kinase Inhibitor	0.205589	4.77942e-06	4.77942e-06
Imiquimod	Immune	109	95		PRT062607 (GDSC2:1631)	Kinase Inhibitor	0.193654	1.61597e-05	1.61597e-05
Irinotecan hydrochloride	DNA Replication Inhibitor	51	68		GSK2606414 (GDSC2:1618)	Kinase Inhibitor	0.185942	3.44802e-05	3.44802e-05
Ivosidenib	Metabolic	105	109		AMG-319 (GDSC2:2045)	Kinase Inhibitor	0.188419	5.45101e-05	5.45101e-05
Ixabepilone	Anti-tubulin	28	48		nilotinib (GDSC2:1013)	Kinase Inhibitor	0.192902	0.000105492	0.000105492
Ixazomib citrate	Proteosome Inhibitor	20	32		VE-822 (GDSC2:1613)	Kinase Inhibitor	0.181415	0.000125517	0.000125517
Lapatinib	Kinase Inhibitor	89	107		WZ4003 (GDSC2:1614)	Kinase Inhibitor	0.167201	0.000216623	0.000216623
Larotrectinib	Kinase Inhibitor	105	99		ruxolitinib (GDSC2:1507)	Kinase Inhibitor	0.199776	0.000791285	0.000791285
Lenalidomide	Other	92	92		WY-090217 (GDSC2:1084)	Kinase Inhibitor	0.150726	0.00103366	0.00103366
Lenvatinib	Kinase Inhibitor	107	92		NVP-ADW742 (GDSC2:1932)	Kinase Inhibitor	0.135077	0.00143873	0.00143873
Letrozole	Hormone	116	87		BVD-523 (GDSC2:2047)	Kinase Inhibitor	0.140101	0.00146672	0.00146672
Lomustine	dNA Damage	105	47		dasatinib (GDSC2:1079)	Kinase Inhibitor	0.142714	0.0017401	0.0017401
Mechlorethamine hydrochloride	DNA Damage	45	65		OSI-027 (GDSC2:1594)	Kinase Inhibitor	-0.283202	0.00188686	0.00188686
Megestrol acetate	Hormone	127	31		AT13148 (GDSC2:2170)	Kinase Inhibitor	0.136602	0.0024431	0.0024431
Melphalan hydrochloride	Kinase Inhibitor	89	75		PLX4720 (GDSC2:1036)	Kinase Inhibitor	0.132684	0.00338414	0.00338414
Mercaptopurine	Antimetabolite	102	87		trametinib (GDSC2:1372)	Kinase Inhibitor	-0.12083	0.00547916	0.00547916
Methotrexate	Other	59	50		BI-2536 (GDSC2:1086)	Kinase Inhibitor	0.464973	0.00559326	0.00559326
Methoxsalen	Metabolic	115	95		crizotinib (GDSC2:1083)	Kinase Inhibitor	-0.147721	0.00605268	0.00605268
Mitomycin	DNA Replication Inhibitor	41	66		AZD5363 (GDSC2:1916)	Kinase Inhibitor	0.103925	0.0150312	0.0150312
Mitotane	Hormone	125	96		KU-55933 (GDSC2:1030)	Kinase Inhibitor	0.374935	0.0157199	0.0157199
Mitoxantrone	Cell Cycle Iinhibitor	29	83		BMS-345541 (GDSC2:1249)	Kinase Inhibitor	0.108887	0.0161111	0.0161111
Nelarabine	Antimetabolite	105	101		GNE317 (GDSC2:1926)	Kinase Inhibitor	0.101964	0.0171573	0.0171573
Neratinib	Kinase Inhibitor	69	29		GS-9973 (GDSC2:1630)	Kinase Inhibitor	0.103619	0.0211245	0.0211245
Nilotinib	Kinase Inhibitor	94	92		alpelisib (GDSC2:1560)	Kinase Inhibitor	-0.0986475	0.023396	0.023396
Niraparib hydrochloride	DNA Damage	77	90		cediranib (GDSC2:1922)	Kinase Inhibitor	0.0930402	0.0281164	0.0281164
Olaparib	DNA Damage	75	67		Ro-3306 (GDSC2:1052)	Kinase Inhibitor	0.350399	0.0334892	0.0334892
Omacetaxine mepesuccinate	Other	21	28		BMS-536924 (GDSC2:1091)	Kinase Inhibitor	0.0847403	0.0461922	0.0461922
Osimertinib	Kinase Inhibitor	78	77		KU-57788 (GDSC2:1038)	Kinase Inhibitor	0.305506	0.0491286	0.0491286
Oxaliplatin	DNA Damage	108	65		savolitinib (GDSC2:1936)	Kinase Inhibitor	-0.0969898	0.058238	0.058238
Paclitaxel	Anti-tubulin	26	43		CZC24832 (GDSC2:1615)	Kinase Inhibitor	0.109279	0.0599756	0.0599756
Palbociclib	Kinase Inhibitor	110	100		GSK1904529A (GDSC2:1093)	Kinase Inhibitor	0.0802002	0.0655542	0.0655542
Panobinostat	Epigenetic	21	39		GSK2110183C (GDSC2:1912)	Kinase Inhibitor	0.0782649	0.0656507	0.0656507
Pazopanib hydrochloride	kinase Inhibitor	97	43		GSK2578215A (GDSC2:1927)	Kinase Inhibitor	0.0869818	0.0725701	0.0725701
Pemetrexed, Disodium salt, Heptahydrate	Other	75	87		AZD8055 (GDSC2:1059)	Kinase Inhibitor	0.193981	0.0807697	0.0807697
Pentostatin	Metabolic	123	112		PD-0325901 (GDSC2:1060)	Kinase Inhibitor	0.0731734	0.104639	0.104639
Pipobroman	DNA Damage	114	76		VX-11e (GDSC2:2096)	Kinase Inhibitor	-0.0691472	0.105893	0.105893
Plerixafor	Immune	111	97		taselisib (GDSC2:1561)	Kinase Inhibitor	-0.0598237	0.160816	0.160816
Plicamycin	Immune	29	28		tozasertib (GDSC2:1096)	Kinase Inhibitor	0.217924	0.201669	0.201669
Pomalidomide	OTher	110	90		doramapimod (GDSC2:1042)	Kinase Inhibitor	-0.208691	0.215141	0.215141
Ponatinib	Kinase Inhibitor	69	51		GDC-0941 (GDSC2:1058)	Kinase Inhibitor	0.0506685	0.24025	0.24025
Pralatrexate	Metabolic	51	31		uprosertib (GDSC2:2106)	Kinase Inhibitor	0.0437002	0.317607	0.317607
Procarbazine hydrochloride	DNA Damage	128	43		linsitinib (GDSC2:1510)	Kinase Inhibitor	0.0407179	0.346316	0.346316
Raloxifene	Hormone	110	46		BMS-754807 (GDSC2:2171)	Kinase Inhibitor	0.157908	0.357678	0.357678
Regorafenib	Kinase Inhibitor	104	45		axitinib (GDSC2:1021)	Kinase Inhibitor	0.145312	0.370971	0.370971
Ribociclib	Kinase Inhibitor	111	110		GSK 269962A (GDSC2:1192)	Kinase Inhibitor	0.140345	0.387719	0.387719
Romidepsin	Epigenetic	20	29		AZD4547 (GDSC2:1786)	Kinase Inhibitor	0.0386072	0.431687	0.431687
Rucaparib phosphate	DNA Damage	89	94		MK-2206 (GDSC2:1053)	Kinase Inhibitor	0.0338011	0.435695	0.435695
Sirolimus	Kinase Inhibitor	78	65		SB 216763 (GDSC2:1025)	Kinase Inhibitor	-0.0960821	0.473082	0.473082
Sorafenib	Kinase Inhibitor	105	98		ribociclib (GDSC2:1632)	Kinase Inhibitor	-0.107108	0.546562	0.546562
Streptozocin	Metabolic	123	118		uprosertib (GDSC2:1553)	Kinase Inhibitor	0.0229907	0.613137	0.613137
Sunitinib	Kinase Inhibitor	115	83		AZD6482 (GDSC2:2169)	Kinase Inhibitor	0.0742875	0.648701	0.648701
Talazoparib	DNA Damage	55	79		AZD8186 (GDSC2:1918)	Kinase Inhibitor	0.0163437	0.706309	0.706309
Tamoxifen citrate	Hormone	112	76		BVD-523 (GDSC2:1908)	Kinase Inhibitor	-0.0145768	0.735151	0.735151
Temozolomide	DNA Damage	105	100		PD-173074 (GDSC2:1049)	Kinase Inhibitor	0.0163907	0.769175	0.769175
Temsirolimus	Kinase Inhibitor	81	37		PF-4708671 (GDSC2:1129)	Kinase Inhibitor	-0.0226832	0.888052	0.888052
Teniposide	Other	35	89		BPD-00008900 (GDSC2:1998)	Kinase Inhibitor	0.00658695	0.899107	0.899107
Thalidomide	Other	121	102		ZM 447439 (GDSC2:1050)	Kinase Inhibitor	-0.0154258	0.922759	0.922759
Thioguanine	Antimetabolite	96	58		GDC 0068 (GDSC2:1924)	Kinase Inhibitor	0.00382306	0.929635	0.929635
Thiotepa	DNA Damage	116	114		LJI308 (GDSC2:2107)	Kinase Inhibitor	-0.112802	0.0475719	0.0475719
Topotecan hydrochloride	DNA Replication Inhibitor	27	43		FK-866 (GDSC2:1248)	Metabolic	0.378222	4.27839e-10	4.27839e-10
Trametinib	Kinase Inhibitor	84	80		Zoledronic acid (GDSC2:1802)	Metabolic	0.127914	0.0381672	0.0381672
Tretinoin	Metabolic	95	103		AGI-6780 (GDSC2:1634)	Metabolic	0.0523428	0.271624	0.271624
Triethylenemelamine	Other	48	76		AGI-5198 (GDSC2:1913)	Metabolic	-0.0434238	0.362959	0.362959
Trifluridine	Other	90	41		Dihydrorotenone (GDSC2:1827)	Metabolic	-0.0240876	0.583665	0.583665
Uracil mustard	DNA Damage	97	65		MST-312 (GDSC2:1930)	Other	0.413481	3.30094e-24	3.30094e-24
Uridine triacetate	Antimetabolite	104	107		BI-97C1 (GDSC2:1849)	Other	0.41101	3.19281e-23	3.19281e-23
Valrubicin	Other	52	71		AUY922 (GDSC2:1559)	Other	0.409863	4.61082e-20	4.61082e-20
Vandetanib	Kinase Inhibitor	85	86		pevonedistat (GDSC2:1529)	Other	0.352974	1.59828e-17	1.59828e-17
Vemurafenib	Kinase Inhibitor	103	123		YK-4-279 (GDSC2:1239)	Other	0.350611	2.52671e-17	2.52671e-17
Venetoclax	Other	117	89		Oxyphenisatin acetate (GDSC2:1804)	Other	-0.337316	2.41393e-14	2.41393e-14
Vinblastine sulfate	Anti-tubulin	27	34		Elephantin (GDSC2:1835)	Other	0.278775	9.7703e-11	9.7703e-11
Vincristine sulfate	Anti-tubulin	27	31		venetoclax (GDSC2:1909)	Other	0.281369	6.56314e-10	6.56314e-10
Vinorelbine tartrate	Anti-tubulin	37	44		bortezomib (GDSC2:1191)	Other	0.261735	8.17467e-10	8.17467e-10
Vismodegib	Other	98	83		obatoclax (GDSC2:1068)	Other	0.223847	1.392e-07	1.392e-07
Vorinostat	Epigenetic	50	35		APR-246 (GDSC2:1131)	Other	0.244709	2.36737e-07	2.36737e-07
Zoledronic acid	Metabolic	96	91		ABT737 (GDSC2:1910)	Other	0.214088	3.64248e-07	3.64248e-07
					nutlin-3 (GDSC2:1047)	Other	0.210685	3.98579e-06	3.98579e-06
					Pyridostatin (GDSC2:2044)	Other	0.180188	2.76057e-05	2.76057e-05
					fludarabine (GDSC2:1813)	Other	0.182084	9.8998e-05	9.8998e-05
					YM-155 (GDSC2:1941)	Other	0.158683	0.000165038	0.000165038
					MIM-1 (GDSC2:1996)	Other	0.149634	0.000682022	0.000682022
					navitoclax (GDSC2:1011)	Other	0.136575	0.00159125	0.00159125
					Sinularin (GDSC2:1838)	Other	-0.147823	0.00272762	0.00272762
					LCL161 (GDSC2:1557)	Other	-0.159915	0.00456621	0.00456621
					AZD5582 (GDSC2:1617)	Other	0.106335	0.0171588	0.0171588
					ML323 (GDSC2:1629)	Other	0.0901631	0.0447444	0.0447444
					BIBR-1532 (GDSC2:2043)	Other	0.0929325	0.0745897	0.0745897
					UMI-77 (GDSC2:1939)	Other	0.073614	0.090758	0.090758
					GTPL8020 (GDSC2:1855)	Other	0.0792085	0.091851	0.091851
					WEHI-539 (GDSC2:1997)	Other	0.0716767	0.101881	0.101881
					CS-1421 (GDSC2:1564)	Other	-0.0563652	0.179776	0.179776
					Gallibiscoquinazole (GDSC2:1830)	Other	-0.0691973	0.193981	0.193981
					MIRA-1 (GDSC2:1931)	Other	0.0786756	0.211433	0.211433
					SB 505124 (GDSC2:1194)	Other	0.187271	0.288899	0.288899
					LY2109761 (GDSC2:1852)	Other	-0.0672974	0.304273	0.304273
					P22077 (GDSC2:1933)	Other	0.0350729	0.469775	0.469775
					Picolinate (GDSC2:1635)	Other	0.0458745	0.470242	0.470242
					WIKI4 (GDSC2:1940)	Wnt signaling	-0.140076	0.00133418	0.00133418
					MN-64 (GDSC2:1854)	Wnt signaling	-0.154386	0.00195725	0.00195725
					Wnt Inhibitor IWP-2 (GDSC2:1576)	Wnt signaling	0.0909942	0.14897	0.14897
					wnt-c59 (GDSC2:1622)	Wnt signaling	0.0584776	0.216705	0.216705
					XAV 939 (GDSC2:1268)	Wnt signaling	-0.0207389	0.676569	0.676569
					AZ6102 (GDSC2:2109)	Wnt signaling	-0.0164061	0.702349	0.702349
					LGK-974 (GDSC2:1598)	Wnt signaling	0.00928462	0.828786	0.828786
